# Quercetin Targets Cysteine String Protein (CSP $\alpha$ ) and Impairs Synaptic Transmission

Fenglian Xu<sup>2</sup>, Juliane Proft<sup>1</sup>, Sarah Gibbs<sup>1</sup>, Bob Winkfein<sup>1</sup>, Jadah N. Johnson<sup>1</sup>, Naweed Syed<sup>2</sup>, Janice E. A. Braun<sup>1\*</sup>

<sup>1</sup> Hotchkiss Brain Institute, Department of Physiology and Pharmacology, University of Calgary, Calgary, Alberta, Canada, <sup>2</sup> Department of Anatomy and Cell Biology, University of Calgary, Calgary, Alberta, Canada

## Abstract

**Background:** Cysteine string protein (CSP $\alpha$ ) is a synaptic vesicle protein that displays unique anti-neurodegenerative properties. CSP $\alpha$  is a member of the conserved J protein family, also called the Hsp40 (heat shock protein of 40 kDa) protein family, whose importance in protein folding has been recognized for many years. Deletion of the CSP $\alpha$  in mice results in knockout mice that are normal for the first 2–3 weeks of life followed by an unexplained presynaptic neurodegeneration and premature death. How CSP $\alpha$  prevents neurodegeneration is currently not known. As a neuroprotective synaptic vesicle protein, CSP $\alpha$  represents a promising therapeutic target for the prevention of neurodegenerative disorders.

**Methodology/Principal Findings:** Here, we demonstrate that the flavonoid quercetin promotes formation of stable CSP $\alpha$ -CSP $\alpha$  dimers and that quercetin-induced dimerization is dependent on the unique cysteine string region. Furthermore, in primary cultures of *Lymnaea* neurons, quercetin induction of CSP $\alpha$  dimers correlates with an inhibition of synapse formation and synaptic transmission suggesting that quercetin interferes with CSP $\alpha$  function. Quercetin's action on CSP $\alpha$  is concentration dependent and does not promote dimerization of other synaptic proteins or other J protein family members and reduces the assembly of CSP $\alpha$ :Hsc70 units (70kDa heat shock cognate protein).

**Conclusions/Significance:** Quercetin is a plant derived flavonoid and popular nutritional supplement proposed to prevent memory loss and altitude sickness among other ailments, although its precise mechanism(s) of action has been unclear. In view of the therapeutic promise of upregulation of CSP $\alpha$  and the undesired consequences of CSP $\alpha$  dysfunction, our data establish an essential proof of principle that pharmaceutical agents can selectively target the neuroprotective J protein CSP $\alpha$ .

**Citation:** Xu F, Proft J, Gibbs S, Winkfein B, Johnson JN, et al. (2010) Quercetin Targets Cysteine String Protein (CSP $\alpha$ ) and Impairs Synaptic Transmission. PLoS ONE 5(6): e11045. doi:10.1371/journal.pone.0011045

**Editor:** Hitoshi Okazawa, Tokyo Medical and Dental University, Japan

**Received:** December 7, 2009; **Accepted:** May 21, 2010; **Published:** June 10, 2010

**Copyright:** © 2010 Xu et al. This is an open-access article distributed under the terms of the Creative Commons Attribution License, which permits unrestricted use, distribution, and reproduction in any medium, provided the original author and source are credited.

**Funding:** This work was funded by CIHR MOP-49476(JEAB) FRN-49600(NIS). JEAB is an AHFMR senior scholar. FX is an AHFMR and HBI Postdoctoral Fellow. The funders had no role in study design, data collection and analysis, decision to publish, or preparation of the manuscript.

**Competing Interests:** The authors have declared that no competing interests exist.

\* E-mail: braunj@ucalgary.ca

## Introduction

In neurons, there are significant demands on cellular folding events. Complex interactions between multiple cellular components underlie synaptic transmission, a process that occurs with speed, precision and plasticity for extended periods of time. Rigorous synaptic quality control mechanisms likely provide defense against the detrimental effects of functionally impaired synaptic proteins. Indeed, Huntington's, Alzheimer's, Parkinson's, Amyotrophic lateral sclerosis and prion diseases are caused by defects in protein folding, underlying the biological importance of the problem of aberrant protein folding in neurons. What synaptic mechanisms mediate the balance between protecting proteins and preventing accumulation of misfolded proteins remains a current biological question.

Cysteine string protein (CSP $\alpha$ ) is a 34 kDa synaptic vesicle protein and molecular chaperone that is critical in the defense against neurodegeneration. CSP $\alpha$ , so called because it contains a 25 amino acid domain comprising a string of 13–15 cysteine

residues, is a member of the conserved J protein family based on the presence of a 70 amino acid signature J domain [1]. CSP $\alpha$  is abundant in neural tissue and displays a characteristic localization to synaptic vesicles [2] as well as clathrin coated vesicles [3]. Furthermore, CSP $\alpha$  null-organisms display widespread neurodegeneration [4–7]. Deletion of the CSP $\alpha$  gene generates mice that are normal for the first 2–3 weeks of life followed by a progressive loss of muscle strength and motor coordination, neurodegeneration, blindness and premature death [5,6]. Although the underlying molecular mechanisms of neurodegeneration in CSP $\alpha$ -null mice have not yet been established, electron microscopic analysis indicates that degeneration begins presynaptically [5]. In *Drosophila*, CSP $\alpha$  knockout flies that survive to adulthood show paralytic uncoordinated sluggish movements, spastic jumping, shaking and temperature sensitive paralysis. While the precise sequence of pathogenic events remains to be identified, the reported defects include a 50% reduction of nerve-evoked neurotransmitter release at 18–22°C, a drastic reduction in evoked release above 29°C, a reduced ability to maintain normal

presynaptic  $\text{Ca}^{2+}$  levels and reduction of synaptic boutons at neuromuscular junctions [8–13]. Reduction in synaptic transmission, temperature sensitive paralysis and premature lethality are reversed by the expression of normal CSP $\alpha$  [9,10,12].

The J domain of CSP $\alpha$  interacts with and activates the ATPase activity of Hsc70 (70 kDa heat shock cognate protein) [14,15] and Hsp70 (70 kDa heat shock protein) [16]. Together with Hsc70 and SGT (small glutamine-rich tetratricopeptide repeat domain protein), CSP $\alpha$  assembles into an enzymatically active chaperone complex [17,18]. Following activation of the heat shock response, another member of the J protein family, Hsp40 (heat shock protein of 40kDa) assembles with the CSP $\alpha$  complex [19]. The presence of this chaperone complex on secretory vesicles suggests that CSP $\alpha$  is a coordinating anchor in key conformation/activity change(s) of client protein(s) critical in synaptic transmission. A number of client proteins for the CSP $\alpha$  system have been proposed including: G proteins, SNAREs (soluble N-ethylmaleimide-sensitive factor attachment receptor), synaptotagmin, rab3, voltage sensitive calcium channels and CFTR (cystic fibrosis transmembrane conductance regulator) [20] and it is likely that neurodegeneration in null-organisms is due to the progressive misfolding and accumulation of dysfunctional client protein(s).

It has been suggested that interference with CSP $\alpha$  function (eg toxic proteins, environmental toxins) may be an underlying mechanism leading to neurodegenerative diseases [5]. It follows that relatively small changes to CSP $\alpha$ 's activity would be expected to significantly affect neural survival, however there is currently no direct support for this notion. In this study, we begin to address the hypothesis that inhibition of CSP $\alpha$  activity may be common to the pathological sequence of events that underlies neurodegenerative disease and that the neuroprotective synaptic vesicle protein CSP $\alpha$  represents a promising therapeutic target for the treatment or prevention of neurodegeneration. Here we identify CSP $\alpha$  as a target for quercetin, a naturally occurring flavonoid. The Western diet contains ~25 mg/day of mixed flavonoids (quercetin ~70%). Quercetin is particularly high in apple skins, green tea and red grapes. It is also a major component of the nutrient supplements *Ginkgo Biloba* and *St. John's Wort*. *Ginkgo Biloba* is widely heralded as a memory enhancer but is also commonly taken for altitude sickness and cancer. *St. John's Wort* is commonly taken for depression. *Ginkgo biloba* leaves have been used for many centuries in traditional Chinese medicine and justification for quercetin supplements is historical rather than mechanistic. In this study we show that quercetin promotes CSP $\alpha$  dimerization and inhibits synaptic transmission as well as synapse development. The identification of quercetin as an agent that targets CSP $\alpha$  is a first step in the identification of pharmaceuticals that target members of the large J protein family and as such serves as proof of principle that pharmaceutical tools can selectively target J proteins. Given CSP $\alpha$ 's anti-neurodegenerative properties, upregulation of CSP $\alpha$  may hold therapeutic promise in protecting nerve terminals from misfolded or toxic proteins [21].

## Results

### Quercetin stimulates formation of CSP $\alpha$ -CSP $\alpha$ dimers

70 kDa detergent-resistant CSP $\alpha$  dimers have been extensively reported in rat brain [16,22,23], various cell lines [24,25] and purified preparations [26] however, the role this dimer plays in CSP $\alpha$ -mediated conformational work is not known. In order to investigate the possibility that the neuroprotective synaptic vesicle protein CSP $\alpha$  can be targeted by pharmaceutical agents, we screened for drugs which initiate changes in CSP $\alpha$  dimerization. **Figure 1A** shows that under control conditions, a small fraction of

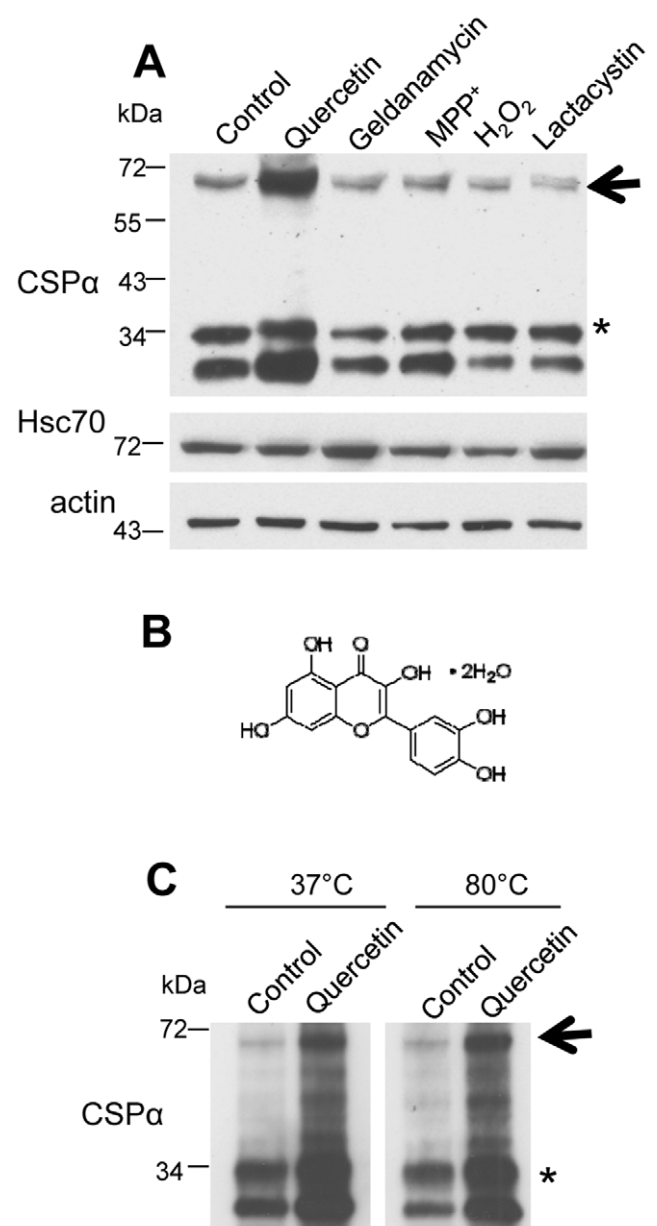

**Figure 1. Quercetin promotes CSP $\alpha$  dimerization.** (A) CAD cells were transiently transfected with 0.5  $\mu\text{g}$  of c-myc-CSP $\alpha$  DNA and treated with the indicated agent (200  $\mu\text{M}$  quercetin, 1  $\mu\text{M}$  geldanamycin, 1.5  $\mu\text{M}$  MPP $^{+}$ , 0.2 mM H $_2$ O $_2$  or 10  $\mu\text{M}$  lactacystin) for 24 hours prior to lysis. 40  $\mu\text{g}$  of cellular protein was resolved by SDS-PAGE and CSP $\alpha$  and Hsc70 were detected by Western analysis.  $\beta$ -actin is shown as a loading control. (B) Chemical structure of quercetin dihydrate. (C) CAD cells were transfected with 1.0  $\mu\text{g}$  of c-myc-CSP $\alpha$  DNA and treated with 100  $\mu\text{M}$  quercetin for 24 hours prior to lysis. 30  $\mu\text{g}$  of protein was heated at either 37°C or 80°C for 10 minutes prior to being resolved on an SDS-PAGE gel. CSP $\alpha$  was detected by Western analysis with a c-myc antibody. Arrows indicate CSP $\alpha$  dimer at ~72 kDa; asterisks indicates palmitoylated CSP $\alpha$  monomer at ~34 kDa. Data are representative of three separate experiments.  
doi:10.1371/journal.pone.0011045.g001

total CSP $\alpha$  is detectable as a dimer in CAD cells (CNS-derived catecholaminergic neuronal cells) in addition to monomeric CSP $\alpha$  (both unmodified and palmitoylated). Post translational modification of CSP $\alpha$ , involving extensive fatty acylation (\*) results in its retarded migration upon SDS-PAGE [22,27]. Interestingly,

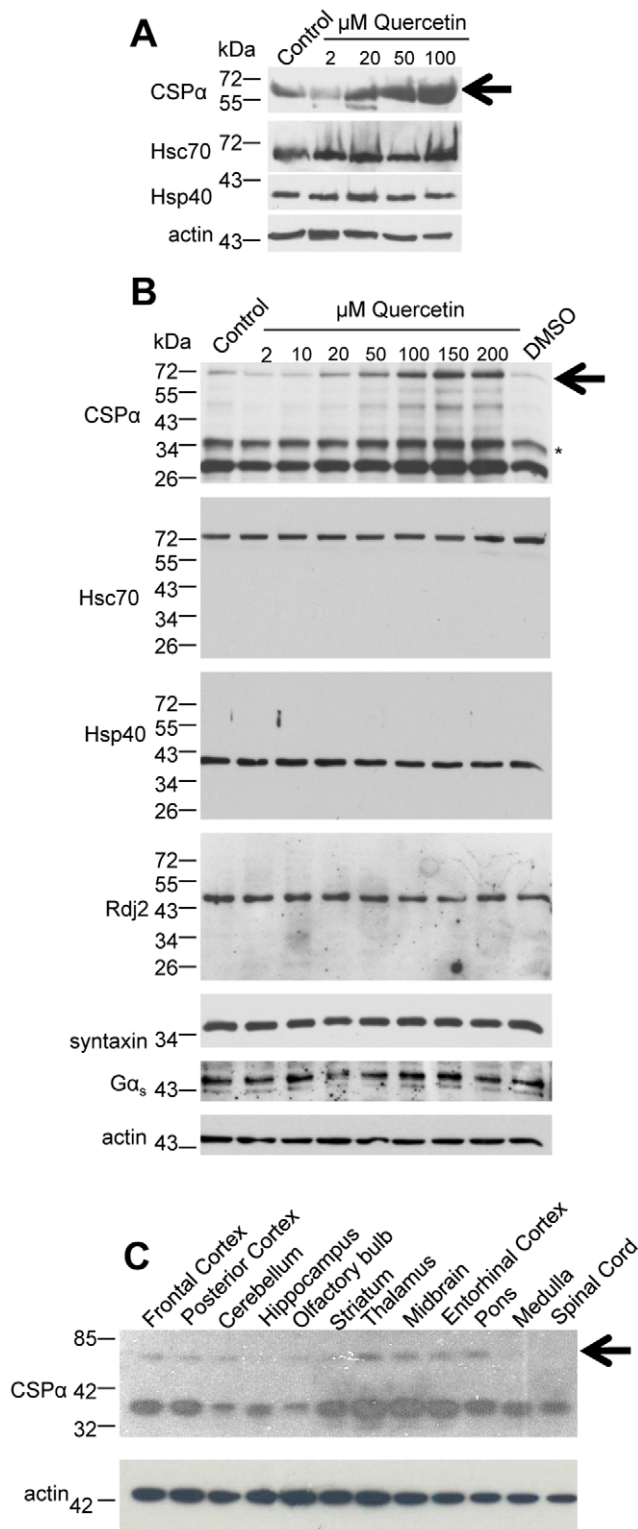

**Figure 2. Quercetin exerts a concentration-dependent effect on the formation of the CSP $\alpha$  dimer in rat cortical neurons and CAD cells.** (A) Western blot of cultured rat cortical neurons were treated with indicated concentrations of quercetin for 24 hours prior to lysis. Equal amounts of cellular protein were resolved by SDS-PAGE as confirmed by ponceau S staining. (B) CAD cells were transiently transfected with 1.0  $\mu$ g c-myc-CSP $\alpha$  DNA and treated with indicated concentrations of quercetin for 24 hours prior to lysis. Following separation of cellular protein (30  $\mu$ g) by SDS-PAGE, CSP $\alpha$ , Hsc70, Hsp40,

Rdj2, syntaxin and G $\alpha_s$  were detected by Western analysis.  $\beta$ -actin is shown as a loading control. Data are representative of three separate experiments. (C) Native CSP $\alpha$  was detected in adult rat brain by Western analysis with a monoclonal anti-CSP $\alpha$  antibody. Twenty-five micrograms of unfractionated tissue homogenate isolated from the indicated regions of rat brain were separated by SDS-PAGE, transferred to PVDF and probed. Arrows indicate the CSP $\alpha$  dimer at  $\sim$ 72 kDa; \* indicates a palmitoylated CSP $\alpha$  monomer at  $\sim$ 34 kDa. Actin is shown as a loading control.

doi:10.1371/journal.pone.0011045.g002

exposure to quercetin stimulates increased CSP $\alpha$  dimerization in CAD cells. The CSP $\alpha$  dimer was detected by Western analysis with either anti-myc monoclonal or anti-CSP $\alpha$  polyclonal antibodies. The structure of quercetin (3,3',4',5,7-pentapentahydroxyflavone), a common dietary flavonoid, is shown in **Figure 1B**. In contrast to quercetin, the Hsp90 inhibitor geldanamycin, the neurotoxin MPP $^+$ , the oxidizing agent H $_2$ O $_2$  and the proteasome inhibitor lactacystin, did not stimulate CSP $\alpha$  dimerization, indicating that quercetin's effect on CSP $\alpha$  is selective. The quercetin-induced CSP $\alpha$  dimer is resistant to disruption by incubation in SDS-containing sample buffer at either 37°C or 80°C (**Figure 1C**). SDS separates the vast majority of cellular protein complexes to monomers by treatment 37°C and more stable protein complexes at 80°C. The SDS and temperature resistance of the CSP $\alpha$ -CSP $\alpha$  complex demonstrates the great stability of the dimer. In contrast, no oligomerization or changes in expression of Hsc70 were observed. Actin detection is shown as a loading control. Our data demonstrate that the extremely stable CSP $\alpha$ -CSP $\alpha$  complex is selectively increased by quercetin.

We then asked if quercetin has the same effect in rat cortical neuronal cultures. **Figure 2A** shows that quercetin promoted CSP $\alpha$  dimerization in a concentration (20  $\mu$ M-100  $\mu$ M) dependent manner in cortical neurons expressing endogenous levels of CSP $\alpha$ . Increases in dimer were detectable at 20  $\mu$ M quercetin. The expression levels of Hsc70 and Hsp40 chaperones which are known to associate with CSP $\alpha$  [14,15,15,16,19], were not altered by quercetin in treated cortical cultures. Actin is shown as a loading control. No CSP $\alpha$  dimerization was initiated by the DMSO vehicle control. The concentration-dependent induction of the CSP $\alpha$  dimer by quercetin in CAD cells is shown in **Figure 2B**. No changes in either the expression or formation of dimers were observed for the chaperones Hsc70, Hsp40, Rdj2 or the putative CSP $\alpha$  client proteins G $\alpha_s$  and syntaxin, consistent with findings in cortical neurons. **Figure 2C** shows that relative differences in CSP $\alpha$  monomer and dimer expression are further observed in different rat brain regions. The CSP $\alpha$  dimer was highest in the thalamus, midbrain, entorhinal cortex and pons and low in the spinal cord and medulla. Taken together, these results show that a) in intact brain, the expression of CSP $\alpha$ -CSP $\alpha$  dimers is region specific, b) in cortical neurons CSP $\alpha$  dimerization is induced in the presence of quercetin in a concentration dependent manner and c) quercetin does not cause a generalized oligomerization of J proteins.

We next established the time course of quercetin's induction of CSP $\alpha$  dimers. Transfected CAD cells were treated with 100  $\mu$ M quercetin, lysed at 5 min, 8 hrs, 24 hrs, 48 hrs and the formation of CSP $\alpha$  dimers evaluated by Western analysis with an anti-myc antibody and quantified by Biorad multiimager and QuantityOne software. **Figure 3A** shows that in the presence of quercetin the CSP $\alpha$ -CSP $\alpha$  dimer is 4 fold higher at 24 hrs compared to control. At 5 min, no difference in CSP $\alpha$  dimer expression was observed between control and quercetin treated CAD cells transiently expressing CSP $\alpha$ , suggesting that quercetin is acting to stabilize the CSP $\alpha$  dimer. Consistent with these findings **Figures 1 and 2**

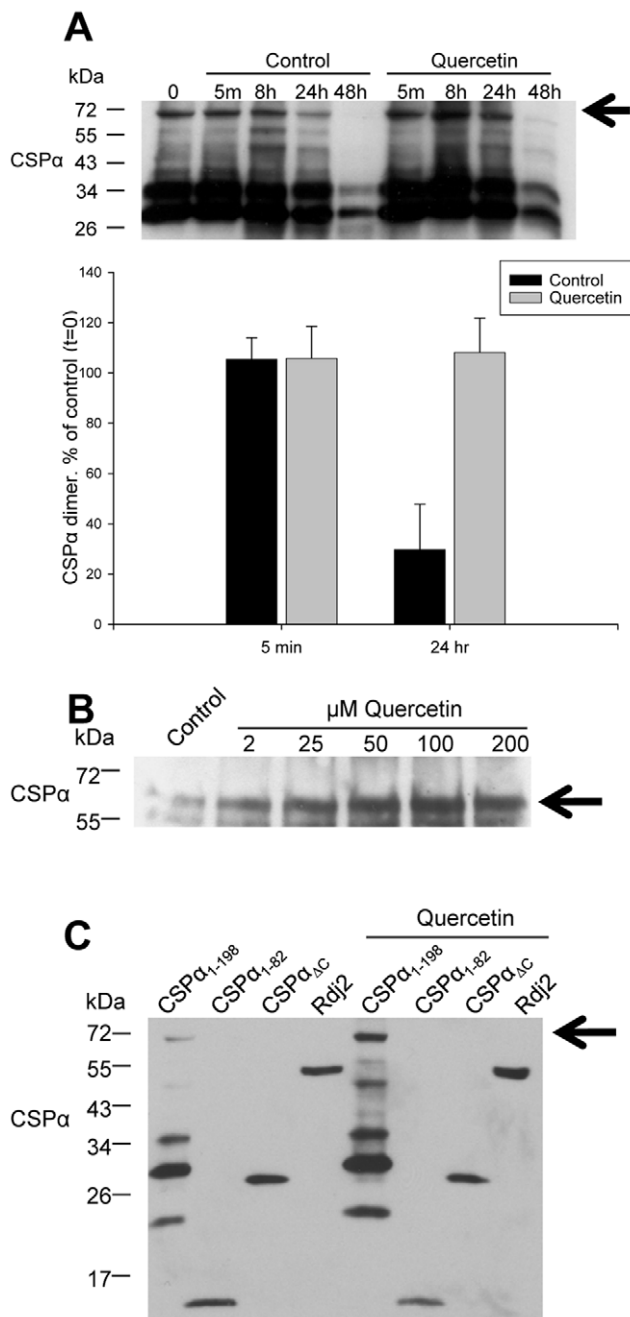

**Figure 3. Quercetin increases the stability of the CSP $\alpha$  dimer in CAD cells.** (A) CAD cells were transfected with 1.0  $\mu$ g of c-myc CSP $\alpha$  DNA and treated with 100  $\mu$ M quercetin as shown. Cells were lysed at indicated times following quercetin treatment. 30  $\mu$ g of protein was resolved. Upper panel: CSP $\alpha$  was detected by Western analysis with the c-myc antibody. Lower panel: Quantification of the CSP $\alpha$  dimer at 5 minutes and 24 hours in control and quercetin-treated cells. Results are expressed as mean  $\pm$  SE for a total of 4 separate experiments. (B) Equal volumes of purified recombinant rat CSP $\alpha$  were treated with indicated concentrations of quercetin for 24 hrs (C) CAD cells were transfected with 1.0  $\mu$ g CSP $\alpha_{1-198}$ , CSP $\alpha_{1-82}$ , CSP $\alpha_{\Delta C}$  and Rdj2 DNA and treated with 100  $\mu$ M quercetin for 24 hours. Arrows indicate CSP $\alpha$  dimer at  $\sim$ 72 kDa. Data are representative of three separate experiments.

doi:10.1371/journal.pone.0011045.g003

demonstrate that regardless of whether CSP $\alpha$  is expressed as a heterologous protein, (i.e. transient expression in CAD cells) or present under native conditions (i.e. cortical neurons), quercetin increases dimer expression and this increase is likely due to enhanced dimer stabilization. In addition, the proteasome inhibitor lactacystin was not found to promote CSP $\alpha$  dimerization indicating that quercetin is not working as a general proteasome inhibitor. While these data are consistent with a direct interaction between CSP $\alpha$  and quercetin, they do not permit us to rule out the possibility that quercetin acts indirectly to initiate CSP $\alpha$  dimers. To investigate this possibility, we tested the ability of quercetin to directly initiate dimerization of purified recombinant soluble CSP $\alpha$ . **Figure 3B** shows that quercetin triggered dimerization of recombinant CSP $\alpha$  in a concentration dependent manner; we further observed that quercetin promoted dimerization of CSP $\alpha$  in a crude rat brain homogenate (data not shown), demonstrating that quercetin action on CSP $\alpha$  is direct.

To identify which amino acids are important for quercetin-induced CSP $\alpha$ -CSP $\alpha$  dimer formation, we transfected CAD cells with a CSP $\alpha$  truncation construct CSP $\alpha_{1-82}$  that encodes only the J domain, a CSP $\alpha$  deletion construct lacking the cysteine string region amino acids 113–136, CSP $\alpha_{\Delta C}$ , or the neural J protein Rdj2 (also called DnaJA2). The lack of quercetin-induced dimerization of CSP $\alpha_{1-82}$ , CSP $\alpha_{\Delta C}$  or Rdj2 clearly identifies the cysteine string region (residues 113–138) to be critically involved in dimerization (**Figure 3C**). Rdj2 has a J domain and although it contains 11 cysteines throughout its amino acid sequence, it has no cysteine string region. The cysteine string region is a unique region to CSP $\alpha$  absent in other J proteins, emphasizing the notion that drugs may selectively target unique regions, thereby targeting distinct members of the J protein family. Taken together **Figures 1, 2 and 3** demonstrate that quercetin selectively and directly interacts with CSP $\alpha$  to promote formation of highly stable CSP $\alpha$ -CSP $\alpha$  dimers and that this process is dependent on the cysteine string region of CSP $\alpha$ .

### Quercetin inhibits synapse formation and synaptic transmission

Deletion of CSP $\alpha$  is ultimately linked to a state where the integrity of synaptic terminals is compromised. Therefore, the ability of quercetin to target CSP $\alpha$  prompts the question: does quercetin promote or inhibit synaptic function? To discern between these possible scenarios we evaluated synapse formation in the fresh water snail *Lymnaea stagnalis* primary neuronal culture model that is uniquely suitable for precise measurements of synaptic transmission at a resolution not achievable elsewhere. In these experiments, the functionally defined respiratory neurons VD4 (visceral dorsal 4; presynaptic, cholinergic) and LPeD1 (left pedal dorsal 1; postsynaptic) were plated with their somata juxtaposed onto poly-L-lysine-coated dishes and the excitatory synapses allowed to develop for 12–18 hrs either in the presence or absence of 25 or 100  $\mu$ M quercetin (**Figure 4A**). Prior to intracellular recordings, quercetin was washed off for 1 to 2 hrs and VD4 presynaptic action potentials and LPeD1 excitatory postsynaptic potentials (EPSP) were recorded. As expected, in control synapses, current injection-induced action potentials in VD4 generated 1:1 EPSPs with averaged amplitudes of  $9.8 \pm 1.7$  mV in LPeD1 ( $n = 8$ ) (**Figure 4A and B**) similar to that seen *in vivo* [28–30]. However, in the presence of 25  $\mu$ M quercetin, the mean amplitude of evoked EPSPs was significantly reduced to  $2.5 \pm 0.7$  mV ( $n = 5$ ,  $p < 0.05$ ) (**Figure 4A and 4B, insert**). Five VD4/LPeD1 cultures failed to form synapses in the presence of 100  $\mu$ M of quercetin, while synaptic transmission was detected in 3 neuron pairs but with greatly reduced amplitude ( $0.6 \pm 0.4$  mV)

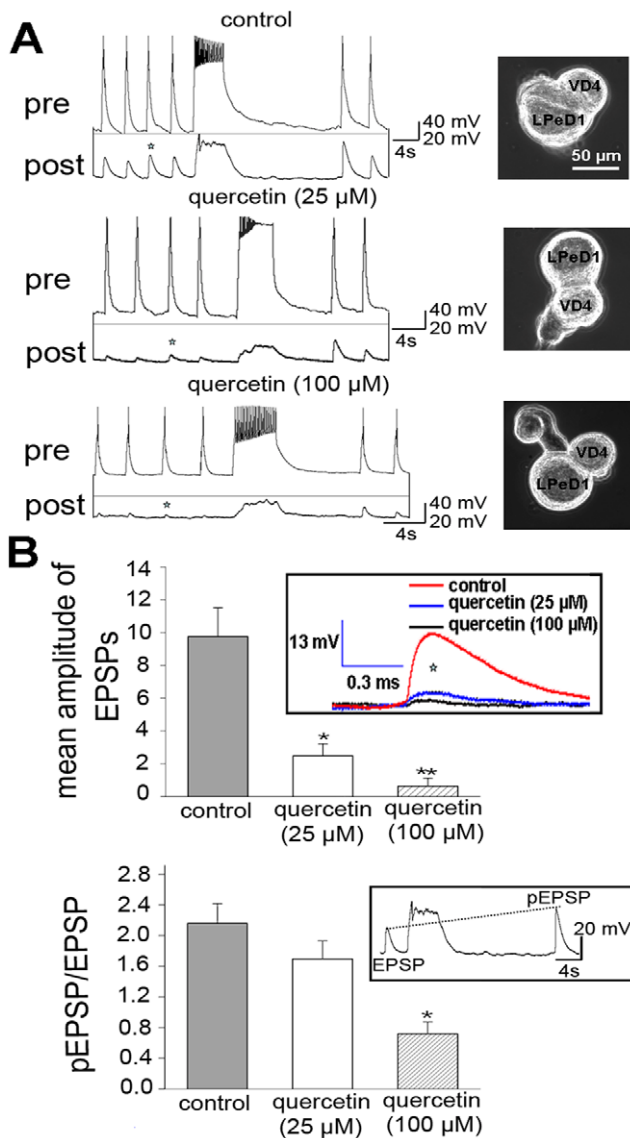

**Figure 4. Quercetin inhibits synapse formation in *Lymnaea stagnalis* primary cultured neurons.** The presynaptic, cholinergic neuron, visceral dorsal 4 (VD4) and the postsynaptic neuron, left pedal dorsal 1 (LPeD1) were juxtaposed and cultured in the absence or presence of quercetin (25 or 100 μM) for 12–18 hours. Prior to intracellular recordings, quercetin was washed off. (A) Sample traces of presynaptic action potentials on VD4 cells and excitatory postsynaptic potentials (EPSPs) on LPeD1 cells. (B) The mean amplitude of EPSP and the ratio of potentiated EPSP (pEPSP) over EPSP was reduced in the presence of both 25 μM quercetin (n=5) and 100 μM quercetin (n=7) (inserts). Statistical significance was determined using Student's *t*-test. \* indicates significant difference at the level of  $p=0.05$ . Error bars indicate S.E. doi:10.1371/journal.pone.0011045.g004

(n = 5). Furthermore, quercetin caused clamping of tetanic action potential firing in 90% of presynaptic VD4 cells examined (n = 21) (Figure 4A). We next measured the amplitude of potentiated EPSP (pEPSP) following a tetanus compared to the amplitude of the EPSPs before tetanus (Figure 4B, insert). The ratio of pEPSP and EPSP was significantly reduced by 100 μM (n = 8) but not by 25 μM (n = 5) of quercetin. Overall, our data establish that quercetin impaired synapse formation and reduced synaptic plasticity in *Lymnaea* and thus support the hypothesis that quercetin

targets and inhibits CSPα function leading to a loss of synaptic integrity.

As expected, Western blot analysis revealed both CSPα monomers and quercetin-induced CSPα-CSPα dimers in *Lymnaea* (Figure 5A). *Lymnaea* were maintained in pond water containing 100 μM quercetin for 12–18 hrs and the VD4 ganglia were then harvested and neuronal proteins were resolved by SDS-PAGE. Native CSPα was detected by Western analysis with the CSPα

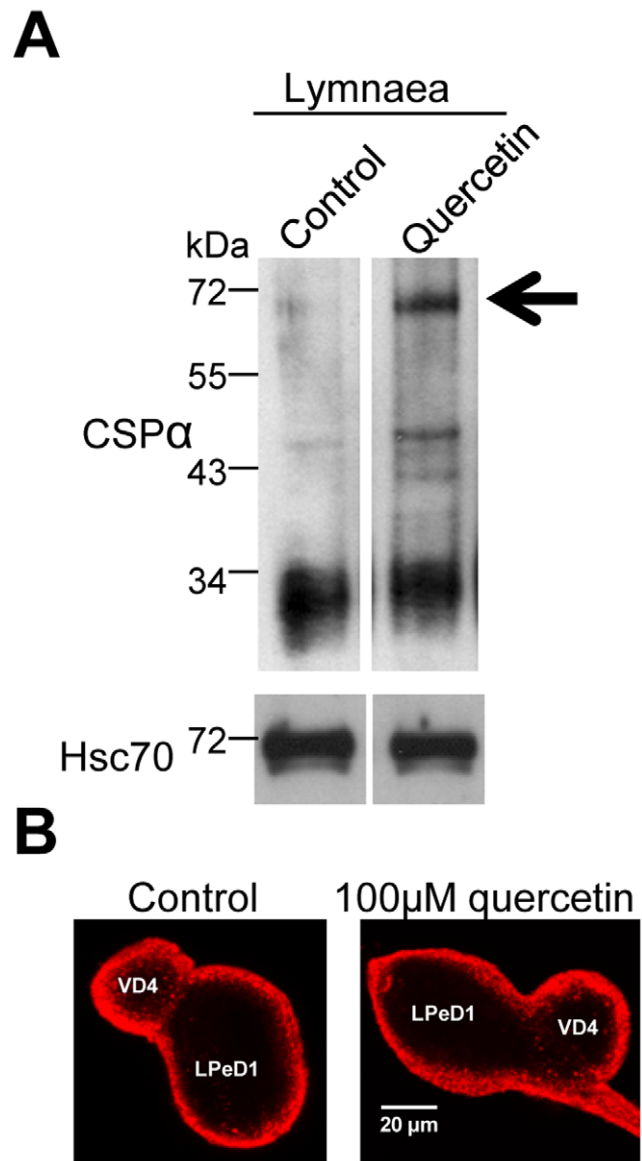

**Figure 5. Quercetin induces the CSPα dimer in *Lymnaea stagnalis*.** (A) *Lymnaea* were maintained in pond water containing 100 μM quercetin over night as indicated prior to harvesting of the VD4 ganglia from several snails. Equal numbers of ganglia were combined and resolved on a gel. Native CSPα was detected by Western analysis with the CSPα polyclonal antibody. The panels shown are from the same experiment and are representative of three independent experiments. Arrow indicates CSPα dimer at ~72 kDa. Hsc70 is shown as a loading control. (B) Paired *Lymnaea* soma were cultured overnight and subjected to immunostaining with CSPα polyclonal antibody. Stacks of 0.28 μm slices were collected and collapsed into Z projections in maximum intensity using ImageJ. Images are representative of five experiments. doi:10.1371/journal.pone.0011045.g005

polyclonal antibody generated against the C terminus of rat CSP $\alpha$ . Quercetin-induced CSP $\alpha$  dimer formation in *Lymnaea* respiratory neurons (Figure 5A) was similar to that found for transfected CAD cells and cortical neurons (Figures 1 and 2). Confocal microscopy confirmed that CSP $\alpha$  is abundant in paired *Lymnaea* neurons, with highest localization observed at the plasma membrane (Figure 5B). No signal was obtained with either quercetin alone or secondary antibody alone (data not shown). In addition to *Lymnaea*, CSP $\alpha$  homologues have been reported in *Torpedo*, *Xenopus*, *Drosophila* and numerous mammals; this high degree of evolutionary conservation of the CSP $\alpha$  system makes a strong case for an important cellular function. Of course, J proteins are even more extensively conserved and have been reported in bacteria, plants and viruses [20] where they most certainly are involved in conformational work. Our data provide unequivocal evidence that the sensitivity of the CSP $\alpha$  chaperone system to quercetin is conserved from mammals to *Lymnaea*.

To ask whether the functional defects observed following quercetin treatment of intact neurons were time dependent, we next tested the effects of acute application of quercetin on synaptic transmission. Strikingly, Figure 6 shows that bath application of 25  $\mu$ M quercetin to functional VD4/LPeD1 cultured neurons rapidly reduced synaptic transmission within 10 minutes. Neurons were paired overnight and on day two, simultaneous pre- and postsynaptic intracellular recordings under control conditions clearly showed that induced action potentials in VD4 produced 1:1 EPSPs in LPeD1 and these were potentiated significantly after a brief presynaptic tetanus. The amplitude of EPSPs in LPeD1 was greatly diminished within minutes of perfusion with 25  $\mu$ M quercetin (Figure 6A) indicating that quercetin rapidly inhibited synaptic transmission. A typical action potential is shown before (red) and after (blue) exposure to quercetin. Quercetin prolonged the presynaptic repolarization phase of the action potential, thereby lengthening action potential duration and rendering the neuron incapable of rapid and repetitive firing. Washout of quercetin (10–20 min) did not reverse the reduction in EPSP (Figure 6B) suggesting that quercetin-dependent alteration of CSP $\alpha$  is irreversible in the short term. In the absence of an action potential quercetin did not stimulate exocytosis and spontaneous EPSPs were not observed following exposure to quercetin (data not shown). Larger reductions in EPSP amplitude were observed with 100  $\mu$ M compared to 25  $\mu$ M quercetin. The ratio of the pre-tetanus EPSPs to that of post-tetanus was reduced following quercetin treatment (Figure 6C) demonstrating a reduction in the ability of neurons to exhibit short-term synaptic plasticity.

Even more telling, quercetin did not alter the post synaptic response to acetylcholine (Figure 7A). Postsynaptic LPeD1 cells were cultured overnight (12–18hrs) and 1  $\mu$ M Acetylcholine (ACh), the transmitter released from presynaptic VD4, was exogenously applied before and after exposure to quercetin (25 or 100  $\mu$ M) for 30 mins while the postsynaptic potential was monitored. ACh elicited excitatory postsynaptic potentials which triggered firing of action potentials both before and after the exposure to either 25 or 100  $\mu$ M quercetin for 30 mins ( $n = 4$ ). At higher concentrations of quercetin LPeD1 action potentials showed a slower rate of repolarization.

To further test for quercetin-induced changes in presynaptic function, action potentials were recorded simultaneously with intracellular Ca<sup>2+</sup> concentration [Ca<sup>2+</sup>]<sub>i</sub> measurements before and after perfusion of quercetin (25  $\mu$ M) (Figure 7B). VD4 cells were cultured overnight and then loaded with the fluorescent Ca<sup>2+</sup> indicator, Fura-2 AM. Elevations in intracellular free [Ca<sup>2+</sup>]<sub>i</sub> in response to single action potential and action potential bursts were significantly reduced after exposure to quercetin for

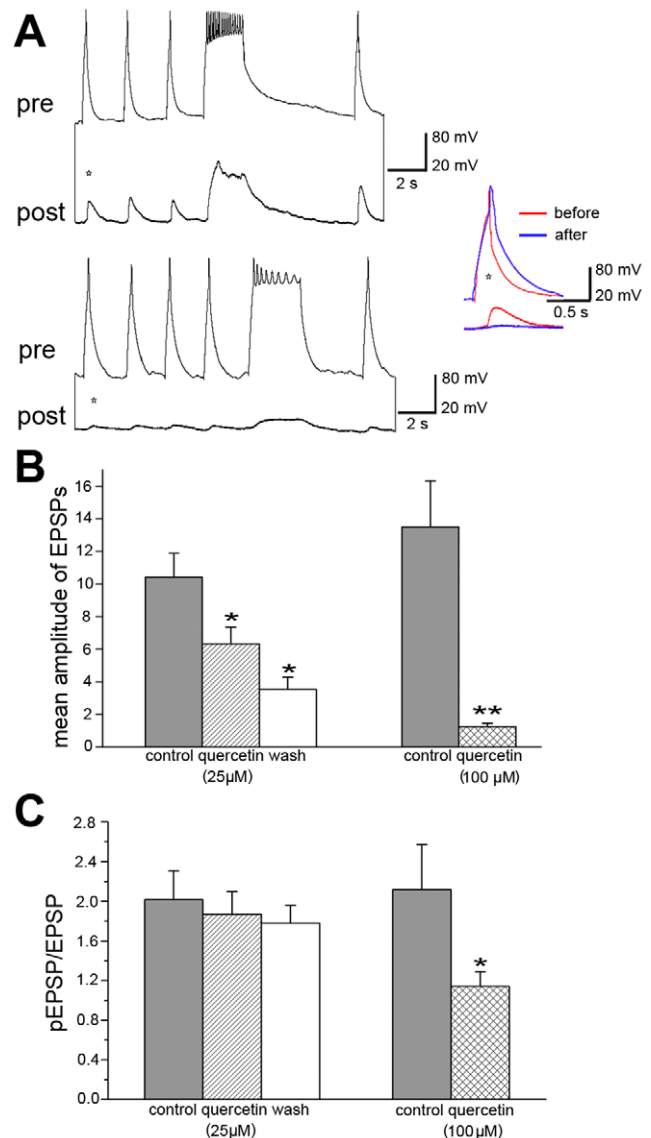

**Figure 6. Acute application of quercetin blocks synaptic transmission in *Lymnaea* neurons.** VD4 (presynaptic) and LPeD1 (postsynaptic) were co-cultured overnight, presynaptic action potentials were induced and the amplitude of the excitatory post synaptic potential (EPSPs) was measured. (A) Quercetin increased the presynaptic repolarization phase of the action potential by predominantly rendering the neuron incapable of firing continuously (clamping of tetanic bursts) \*. The EPSP amplitude was greatly diminished within minutes of perfusion with 100  $\mu$ M quercetin. A typical action potential and EPSP are shown before (red) and after (blue) exposure to quercetin. (B) Summary of the effect of quercetin (25 and 100  $\mu$ M) and following wash out (10–20 mins) on the mean amplitude of action potential-generated EPSPs. (C) Summary of the effect of quercetin (25 and 100  $\mu$ M) and quercetin washout on the ratio of potentiated EPSP (LPeD1) over EPSP. Statistical significance was determined using Student's paired *t*-test. \* indicates significant difference at the level of  $p = 0.05$ . Error bars indicate S.E. doi:10.1371/journal.pone.0011045.g006

20 mins ( $n = 4$ ) compared to control neurons (Figure 7B insert). Because 100  $\mu$ M quercetin induced action potential clamping (Figure 4A and 6A), we opted to directly measure presynaptic Ca<sup>2+</sup> currents (ICa) by whole cell voltage clamp with direct depolarizing steps from holding potential of  $-80$  mV to  $+70$  mV in 10 mV increments. Exposure to 100  $\mu$ M quercetin

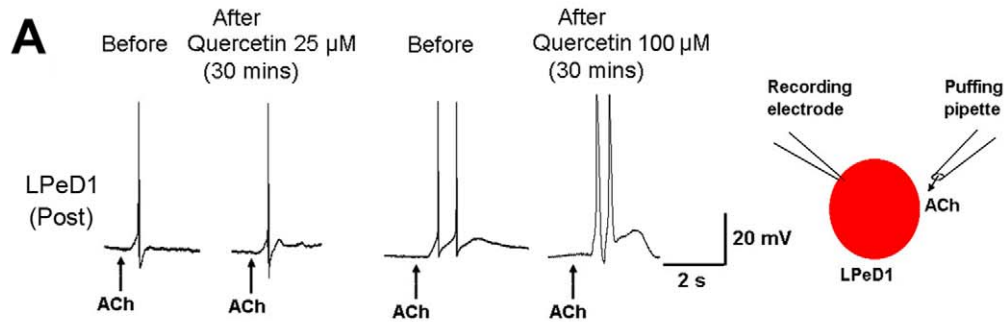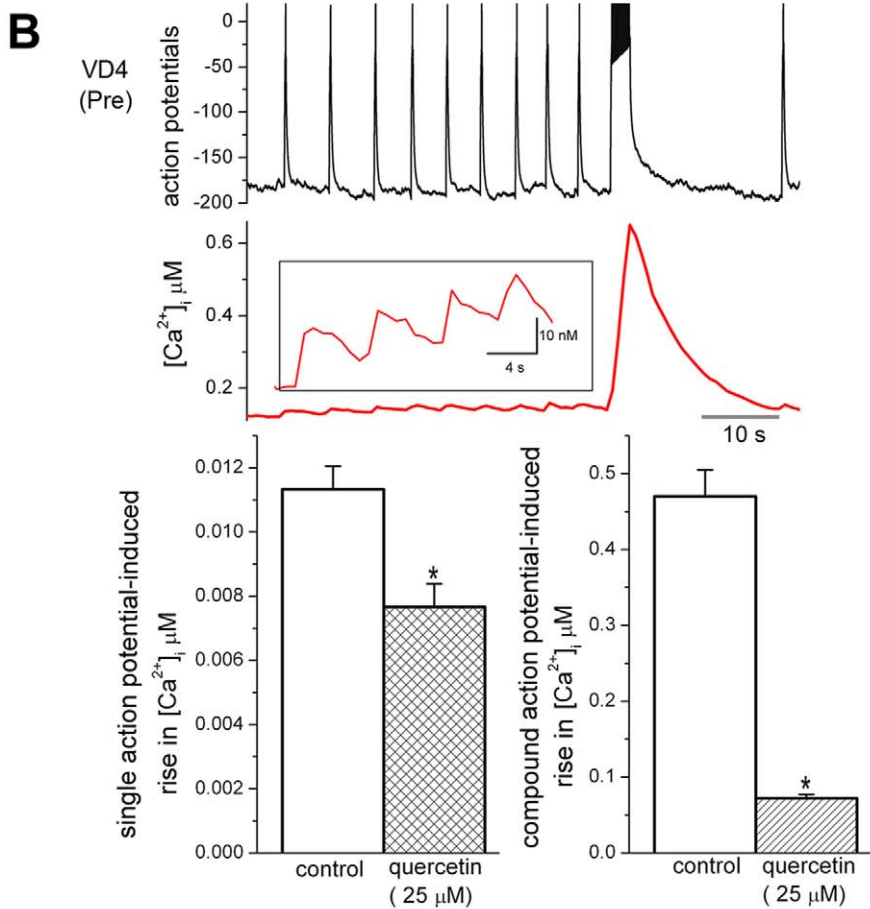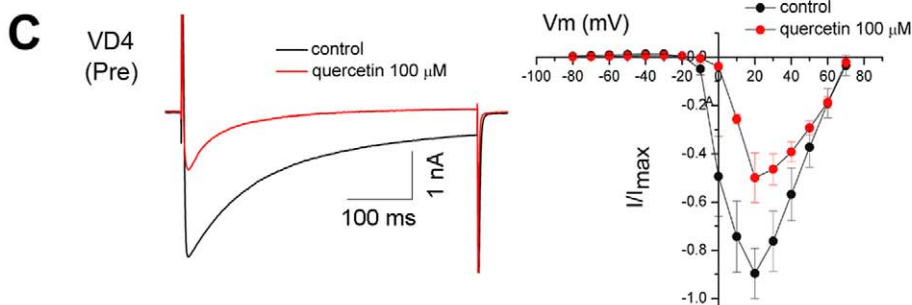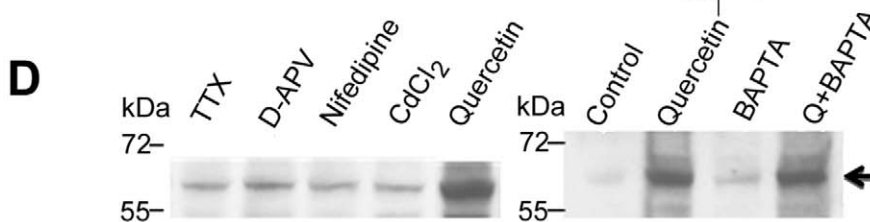

**Figure 7. Quercetin does not alter the postsynaptic left pedal dorsal 1 (LPeD1) response to acetylcholine, but reduces action potential or depolarization-induced  $\text{Ca}^{2+}$  entry into the presynaptic neuron.** (A) LPeD1 cells were cultured. Acetylcholine (ACh, 1  $\mu\text{M}$ ) was exogenously applied before and after exposure to quercetin (25 or 100  $\mu\text{M}$ ) for 30 mins and postsynaptic potential was monitored. (B) Intracellular recording of action potentials from cultured VD4 neurons before and after perfusion of quercetin (25  $\mu\text{M}$ ) were simultaneously made with the measurement of cytoplasmic  $\text{Ca}^{2+}$  concentrations using a  $\text{Ca}^{2+}$  imaging technique. Single action potentials induced corresponding  $\text{Ca}^{2+}$  transients (insert) and burst of action potentials triggered a robust compound  $\text{Ca}^{2+}$  rise. However the mean values of  $[\text{Ca}^{2+}]$  rise in response to single and bursts of action potential were significantly reduced after exposure to quercetin for 20 mins ( $n=4$ ). (C) Quercetin inhibited voltage-gated  $\text{Ca}^{2+}$  currents (ICa) in presynaptic VD4 neurons elicited by step depolarization of cells from  $-80$  mV to  $+70$  mV in 10 mV increments before and after exposure to quercetin 100  $\mu\text{M}$  for 10 mins. The left panel shows representative raw traces of ICa evoked by a square depolarization pulse from  $-80$  mV to  $+20$  mV for 500 ms. The right panel shows normalized current-voltage relations of ICa ( $n=4$ ). (D) CAD cells were transiently transfected with 0.75  $\mu\text{g}$  CSP $\alpha$ , treated with 1  $\mu\text{M}$  tetrodotoxin (TTX), 50  $\mu\text{M}$  D-2-amino-5-phosphonovalerate (D-APV), 50  $\mu\text{M}$  nifedipine, 100  $\mu\text{M}$  CdCl<sub>2</sub> or 100  $\mu\text{M}$  quercetin for 24 hours. Right panel: CAD cells were treated with 100  $\mu\text{M}$  quercetin for 24 hours, 20  $\mu\text{M}$  BAPTA-AM 1 hour as indicated and 30  $\mu\text{g}$  of cell lysate was resolved by SDS-PAGE. Data are representative of three separate experiments.  
doi:10.1371/journal.pone.0011045.g007

for 15 min reduced depolarization-induced  $\text{Ca}^{2+}$  current (Figure 7c). Figure 7C left panel shows raw traces of ICa induced by a depolarization step from  $-80$  mV to  $+20$  mV before and after exposure to quercetin 100  $\mu\text{M}$  for 15 min. Normalized current-voltage relations of ICa, (Figure 7C right panel) shows that the peak current occurred at  $+20$  mV and the normalized peak current was significantly reduced from a control level of  $0.90 \pm 0.10$  to  $0.49 \pm 0.10$  ( $n=4$ ,  $P < 0.05$ ) after 15 mins of 100  $\mu\text{M}$  quercetin. These observations indeed indicate that quercetin indeed rapidly inhibits action potential-induced  $\text{Ca}^{2+}$  entry and reduces synaptic transmission in *Lymnaea* neurons, consistent with the hypothesis that quercetin binds to and inactivates CSP $\alpha$ , leading to a sequence of events that involves disabling ion channels (eg voltage sensitive  $\text{Ca}^{2+}$  channels). We have previously shown that CSP $\alpha$  promotes G protein-mediated inhibition of N-type  $\text{Ca}^{2+}$  channels [23,31] thereby directly regulating  $\text{Ca}^{2+}$  channel activity. Of note, CSP $\alpha$  has been suggested to be a  $\text{Ca}^{2+}$  channel chaperone, but this notion has been controversial [32–38]. In addition, previous studies have concluded that quercetin is both an L type  $\text{Ca}^{2+}$  channel activator [39] and inhibitor [40,41] as well as a BKCa channel activator [42], Kir channel inhibitor [43] and  $\text{Ca}^{2+}$  ATPase inhibitor [44,45]. Although our data in *Lymnaea* VD4/LPeD1 respiratory neurons support the idea that quercetin's inhibition of CSP $\alpha$  activity leads to downstream inhibition of synaptic transmission, these findings together with the above stated reports could potentially also be explained by a direct block of presynaptic  $\text{Ca}^{2+}$  channels by quercetin. Previous studies have demonstrated that lowering extracellular  $\text{Ca}^{2+}$  also blocks synapse formation between cultured *Lymnaea* neurons [46] showing the importance of  $\text{Ca}^{2+}$  in the activation of synaptogenesis.

To establish more definitely if channel blockers generally altered CSP $\alpha$  dimer levels, we again utilized the transiently transfected CAD cell model. No significant differences in CSP $\alpha$  dimer formation was observed following treatment of transiently transfected CAD cells with CdCl<sub>2</sub>, nifedipine, D-2-amino-5-phosphonovalerate (D-APV) or tetrodotoxin (TTX) (Figure 7C). Furthermore, lowering cytosolic free  $[\text{Ca}^{2+}]$  by incubation with the membrane permeable  $\text{Ca}^{2+}$  chelator BAPTA-AM (20  $\mu\text{M}$ ), a  $\text{Ca}^{2+}$  chelator, for 1 hour did not stimulate CSP $\alpha$  dimer formation or influence quercetin's induction of the dimer. Taken together, these data indicate that none of the channel blockers examined promoted CSP $\alpha$ -CSP $\alpha$  dimer formation, suggesting that ion channel block per se or reduction in cytosolic free  $\text{Ca}^{2+}$  does not stimulate CSP $\alpha$  dimerization, while quercetin impaired presynaptic  $\text{Ca}^{2+}$  influx and reduced neuronal ability to maintain normal  $\text{Ca}^{2+}$  levels. Independent of whether quercetin directly targets CSP $\alpha$  and secondarily disables channels or directly targets channels as well as CSP $\alpha$ , the results shown in Figures 4, 5

and 6 demonstrate that quercetin promoted dimerization of CSP $\alpha$ , reduced the amplitude of EPSPs in LPeD1 *Lymnaea* neurons and rapidly triggered a prolongation of presynaptic repolarization associated with inhibition of synaptic transmission and reduced synapse formation.

#### Increases in the CSP $\alpha$ :CSP $\alpha$ dimer correlate with a decrease in active CSP $\alpha$ :Hsc70 units

CSP $\alpha$ -mediated conformational work relies on the assembly of a CSP $\alpha$  with the ATPase Hsc70 [14–17]. To analyze the influence of quercetin on the assembly of the CSP $\alpha$  active chaperone complex, CSP $\alpha$  was immunoprecipitated from CAD cells treated with quercetin and the co-association of Hsc70 was evaluated. The CSP $\alpha$  dimer, monomeric palmitoylated CSP $\alpha$ , and monomeric unpalmitoylated CSP $\alpha$  immunoprecipitated from CAD cell lysates. Following treatment with quercetin, higher levels of CSP $\alpha$  dimer immunoprecipitated as expected. Immunoprecipitation of the monomeric palmitoylated CSP $\alpha$  (but not the unpalmitoylated) species was relatively lower following quercetin. Figure 8 shows

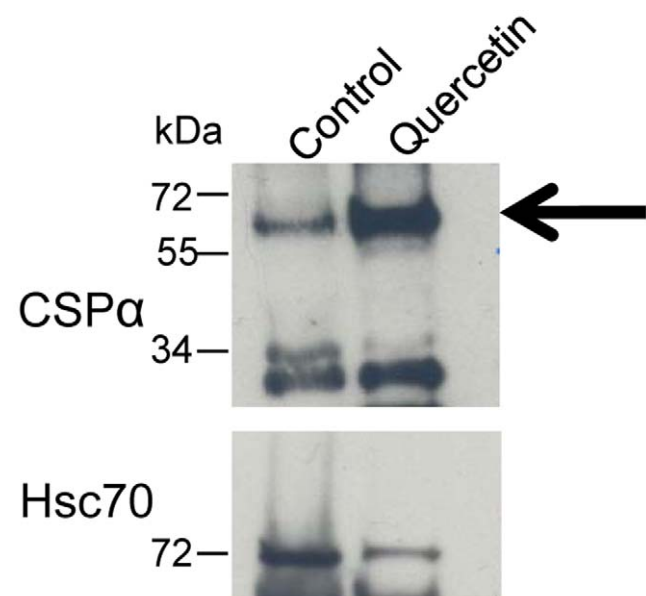

**Figure 8. Quercetin reduces CSP $\alpha$ :Hsc70 association.** Co-immunoprecipitation of CSP $\alpha$  and Hsc70 from control and quercetin-treated CAD cells followed by Western analysis. Immunoprecipitation was achieved by incubating 300  $\mu\text{g}$  CAD cell lysate with anti-MYC monoclonal, immunoprecipitated proteins were separated by SDS-PAGE and evaluated by Western analysis with anti-CSP $\alpha$  polyclonal and anti-Hsc70 monoclonal. Arrow indicates CSP $\alpha$  dimer at  $\sim 72$  kDa. Data are representative of three separate experiments.  
doi:10.1371/journal.pone.0011045.g008



that quercetin treatment reduced Hsc70 association with CSP $\alpha$  indicating that quercetin inhibits assembly of the active chaperone complex. These results suggest that the quercetin-induced changes in CSP $\alpha$  dimerization and synaptic transmission involve inhibition of CSP $\alpha$  chaperone activity.

Finally, we asked whether other flavonoids also elicit an increase in the abundance of CSP $\alpha$ -CSP $\alpha$  dimers. Exposure to epigallocatechin gallate (EGCG) increased CSP $\alpha$  dimerization in CAD cells like that observed for quercetin (Figure 9). The CSP $\alpha$  dimer was detected by Western analysis with anti-myc monoclonal antibody. Figure 9B shows that the ratio of CSP $\alpha$  dimer to monomeric palmitoylated CSP $\alpha$  was higher following quercetin treatment than EGCG treatment. Actin is shown as a loading control. We conclude that quercetin and EGCG are potent activators of CSP $\alpha$  dimerization and predict that the common polyphenol structure is a central structure involved in increasing CSP $\alpha$  dimerization.

## Discussion

Our work fulfills the proof of principle that pharmacological compounds like quercetin can target select members of the J

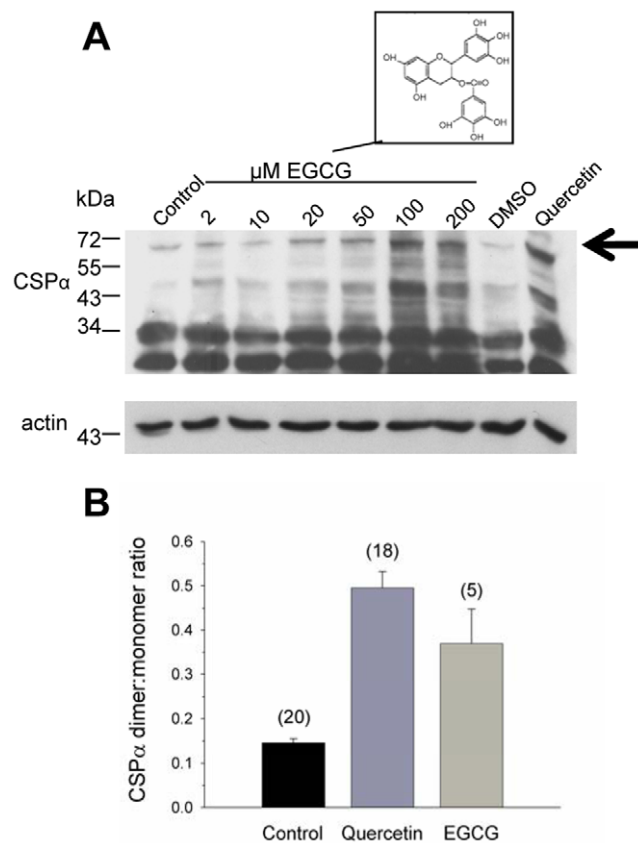

**Figure 9. Epigallocatechin gallate (EGCG) stimulates formation of CSP $\alpha$ -CSP $\alpha$  dimers.** (A) CAD cells were transiently transfected with 1.0  $\mu$ g c-myc-CSP $\alpha$  DNA and treated with indicated concentrations of EGCG for 24 hours prior to lysis. Following separation of cellular protein (30  $\mu$ g) by SDS-PAGE, CSP $\alpha$  was detected by Western analysis.  $\beta$ -actin is shown as a loading control. Arrow indicates CSP $\alpha$  dimer at  $\sim$ 72 kDa. (B) Quantification of the CSP $\alpha$  dimer to monomeric palmitoylated CSP $\alpha$  ratio under control, 100  $\mu$ M quercetin and 200  $\mu$ M EGCG conditions. Numbers in parentheses indicate the numbers of experiments; error bars denote standard errors. doi:10.1371/journal.pone.0011045.g009

protein family to modulate their cellular behavior. Specifically, our data show that the flavonoid, quercetin, interferes with CSP $\alpha$  function to maintain synaptic integrity. A current working model of the CSP $\alpha$  complex is illustrated in Figure 10. In this model, CSP $\alpha$  is anchored to the secretory vesicle and on its own is inactive. At least two other CSP $\alpha$  complexes exist: the active Hsc70/SGT/CSP $\alpha$  complex, and the CSP $\alpha$  dimer. CSP $\alpha$  displays unique anti-neurodegenerative properties and impairments in CSP $\alpha$  activity lead to impairment in synaptic transmission. In our model, quercetin targets CSP $\alpha$ , increases the abundance of stable CSP $\alpha$ -CSP $\alpha$  dimers and reduces assembly of CSP $\alpha$  with Hsc70, thereby reducing the folding capacity of the CSP $\alpha$  complex. CSP $\alpha$  dimerization may be a cause for the inhibition of neurotransmission, synaptic plasticity and synapse formation, essential features of normal brain function but other possibilities exist. Mechanistic insight into neurodegeneration following CSP $\alpha$ -inoperation remains limited but ultimately a reduction in synaptic folding capacity and a progressive buildup of unfolded presynaptic client proteins most likely creates a situation where the integrity of synaptic terminals is compromised.

Quercetin does not initiate widespread oligomerization of J proteins (Figures 2 and 3). The human genome encodes for over 40 J proteins with specific cellular and subcellular distributions [1]. The importance of the J protein family in protein folding has been recognized for many years (Reviewed: [47,48]). Members of the J protein family have a modular architecture in which a signature J domain is grafted to other sequences that impose specific cellular functions. The J domain is a 70 amino acid signature region comprised of four helices with a highly conserved tripeptide of histidine, proline and aspartic acid (HPD motif) located between helices II and III that is critical for chaperone activity. Hsc70 is targeted to a particular substrate through binding to the “J domain” of its partner and regulates the conformation and activity of the target protein via mechanisms that appear to involve cycles of substrate binding and release, which are governed by ATP binding and hydrolysis. Since J proteins are thought to provide the basis for selective chaperone action in the cell they are also promising therapeutic targets for the manipulation of specific protein folding processes [21].

Many questions remain about the biochemical pathway(s) responsible for CSP $\alpha$ -mediated neuroprotection. It is obvious that the CSP $\alpha$  chaperone unit is highly conserved machinery built upon the universal J domain/Hsc70 association and contributes to presynaptic protection. Furthermore, it is known that other J proteins do not compensate for the absence of CSP $\alpha$ , consistent with the idea that CSP $\alpha$  is designed to facilitate specific folding events and that the unfolded CSP $\alpha$  client is toxic. That said, significant efforts towards establishing the identity of CSP $\alpha$  client proteins and the underlying molecular details of CSP $\alpha$ 's essential synaptic quality control are ongoing. Regulators of the degeneration seen in CSP $\alpha$  knockout models have been identified. Chandra and colleagues have shown that  $\alpha$ -synuclein, a small neural protein whose biological function is unclear, selectively modulates the CSP $\alpha$  neurodegeneration pathway [7]. CSP $\alpha$  deficient mice are rescued from presynaptic degeneration and lethality by the overexpression of  $\alpha$ -synuclein. Moreover, ablation of endogenous  $\alpha$ -synuclein accelerates the degeneration of presynaptic terminals observed in mice lacking CSP $\alpha$ . Furthermore,  $\alpha$ -synuclein specifically rescues CSP $\alpha$  deletion, but transgenic  $\alpha$ -synuclein does not rescue the spinal cord degeneration in mice that express mutant superoxide dismutase. Precisely how  $\alpha$ -synuclein abolishes neurodegeneration triggered by the absence of CSP $\alpha$  is unclear. Results reported here show that the cellular

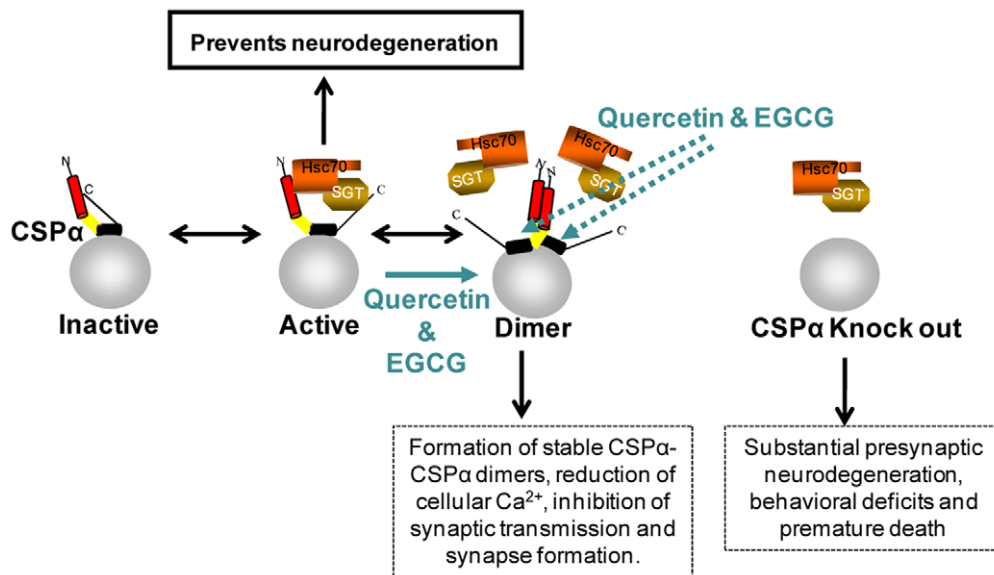

**Figure 10. Model depicting the inhibition of CSP $\alpha$  chaperone activity by quercetin.** The synaptic vesicle protein CSP $\alpha$  has unique anti-neurodegenerative properties. Distinct CSP $\alpha$  complexes exist: inactive, active (in complex with Hsc70 and SGT), and a CSP $\alpha$  dimer. Quercetin promotes the CSP $\alpha$  dimer, inhibits assembly of the active CSP $\alpha$  complex and synaptic transmission. doi:10.1371/journal.pone.0011045.g010

events following exposure to quercetin include i) a reduction in presynaptic  $\text{Ca}^{2+}$  and ii) an increase in the presynaptic repolarization phase rendering neurons incapable of firing continuously, diminishing the amplitude of EPSPs and preventing additional synapse formation. One possibility is that following reduction of CSP $\alpha$  folding activity, a downstream progressive misfolding of protein(s) central to  $\text{Ca}^{2+}$  homeostasis leads to inhibition of synaptic transmission. Another possibility is that quercetin has cellular targets in addition to CSP $\alpha$  perhaps directly blocking voltage dependent  $\text{Ca}^{2+}$  channels. Although the precise mechanism by which quercetin alters  $\text{Ca}^{2+}$  homeostasis remains to be established in detail, it is notable that lowering of cytosolic free  $[\text{Ca}^{2+}]$  with either the  $\text{Ca}^{2+}$  chelator BAPTA-AM or the  $\text{Ca}^{2+}$  channel blocker  $\text{CdCl}_2$  does not stimulate CSP $\alpha$  dimerization, demonstrating that CSP $\alpha$  dimerization is not a general cellular response to  $\text{Ca}^{2+}$  channel blockade. Independent of which explanation is correct, our results illustrate that quercetin targets CSP $\alpha$  and impairs synaptic function.

If quercetin is so powerful in inhibiting synaptic transmission, why do so many choose to supplement their diet with flavonoid mixtures (eg Ginkgo biloba)? Flavonoids are a class of compounds with polyphenolic structures and in all likelihood a spectrum of physiological functions can be expected depending on the position of hydroxyls and side chains. Our results indicate that the common structural features of quercetin and EGCG are important for triggering CSP $\alpha$  dimerization (Figures 1 and 9). Such compromised CSP $\alpha$  activity could contribute to the rate of progression of neurodegenerative (misfolding) diseases (eg. Alzheimer's disease, Huntington's disease) however there is no direct evidence for this notion. Neurotoxicity would depend on the flavonoid mixture utilized, metabolites and final concentration in the CSF (cerebrospinal fluid) after oral intake. Not all related compounds would necessarily inhibit CSP $\alpha$  activity, and it remains to be established if select flavonoids would enhance rather than inhibit CSP $\alpha$  function. Direct evidence supporting a role for flavonoids in memory enhancement is currently not available.

In view of the crucial importance of CSP $\alpha$  in synaptic integrity, our data identify a key role for compounds that interfere with its specialized presynaptic function. We speculate that neuropathological abnormalities could be due to or exacerbated by toxins with inhibitory actions towards CSP $\alpha$  similar to that of quercetin. Conversely, compounds related to quercetin may be found to enhance rather than inhibit CSP $\alpha$  activity. Thus, the identification of quercetin as tool that selectively modulates CSP $\alpha$ 's neuroprotective function is a promising lead towards the identification of agents that enhance CSP $\alpha$ 's neuroprotective function and thereby have a high potential in therapy development for neurodegenerative diseases. Our study further predicts that compounds that selectively target J proteins may have considerable potential as novel therapeutic agents.

## Materials and Methods

### Reagents and chemicals

Anti-CSP $\alpha$  rabbit polyclonal was prepared as described previously [22]. Anti-Hsp40 rabbit polyclonal were from Stressgen. Anti-Hsc70 mouse monoclonal, anti- $\beta$ -actin mouse monoclonal, anti-syntaxin mouse monoclonal, quercetin, forskolin, MPP<sup>+</sup> and lactacystin was from Sigma. Anti-c-myc mouse monoclonal was from Clontech. Anti-CSP $\alpha$  mouse monoclonal was from BD Biosciences. Anti-G $\alpha_s$  rabbit polyclonal and geldanamycin were from Calbiochem. Anti-Rdj2 mouse monoclonal was from Abnova.  $\text{H}_2\text{O}_2$  was from VWR. ACh was obtained from Research Biochemicals (Natick, MA; product A-112)

*CAD mouse neuroblastoma cells* [49,50] were seeded into 6 well plates and grown in DMEM/F12 medium supplemented with 10% fetal bovine serum and 1% penicillin/streptomycin as previously described. For differentiation cells were grown in Opti-MEM for 3 days. Cells were lysed in 40 mM Tris (pH 7.4), 150 mM NaCl, 2 mM EDTA, 1 mM EGTA, 1 mM  $\text{Na}_3\text{VO}_4$ , 0.1% SDS, 1% T-X100, 0.5 mM PMSF and protease inhibitor (Sigma) at 4°C for 1 hour. Lysates were centrifuged at 15000 $\times$ g

for 5 minutes at 4°C and the supernatant was collected. Protein concentration was determined using a Bradford style assay kit (BioRad). For transient transfection, CAD cells were washed in PBS and transiently transfected with c-myc tagged rat CSP $\alpha_{1-198}$  DNA using Lipofectamine-2000 (Invitrogen) in Opti-MEM and maintained in culture for 24 hours prior to treatments.

### Rat cortical neurons

Rat primary cortical neurons (Cryopreserved) were purchased from QBM Cell Science (Ottawa, Canada) and stored in liquid nitrogen. Prior to culture, cells were thawed and gently transferred into pre-warmed neurobasal medium (Invitrogen, No. 21103-049) supplemented with 2% B27 (Invitrogen, 17504-044). Cells were then plated onto poly-D-lysine and laminin coated cover slips and maintained in neurobasal medium for 7 days at 37°C in 5% CO<sub>2</sub> prior to treatment with quercetin for 24 hours. Cells were harvested with lysis buffer and equal volumes of protein lysate were resolved by SDS-PAGE.

### Lymnaea ganglia

Equal numbers of whole ganglia were harvested and lysed at 4°C for 40 minutes and resolved by SDS-PAGE.

Fresh water snails, *Lymnaea stagnalis*, were maintained at room temperature (22–23°C) in a well-aerated aquarium containing filtered pond water. Neurons were isolated from 1–2 month old snails with a shell length of 20–22 mm and the *Lymnaea* brain-conditioned medium was prepared using 3–6 month old animals with a shell length of 25–30 mm. The cell isolation and cell culture procedures have been described in detail elsewhere [51]. Briefly, the *Lymnaea* were dissected and central ring ganglia were removed. Following treatment with Trypsin (2 mg/ml) for 23 mins, the central ring ganglia were then treated with trypsin inhibitor (2 mg/ml) for another 15 mins. Identified presynaptic neuron visceral dorsal 4 (VD4, cholinergic) and postsynaptic neuron left pedal dorsal 1 (LPeD1) (for synaptogenesis and synaptic transmission experiments) were isolated by applying gentle suction through a fire-polished and Sigma-coat (Sigma, St. Louis, MO)-treated pipette. Isolated cells were then plated onto poly-L-lysine coated glass dishes in the presence of either medium (L-15; Life Technologies, Gaithersburg, MD; special order) or conditioned medium which contains trophic factors. Soma-soma synapses were prepared by juxtaposing VD4 and LPeD1 cell bodies against each other. The synapses developed overnight as described previously and were tested through direct intracellular recordings [28].

### Immunoblotting

Proteins were electrotransferred from polyacrylamide gels to 0.45  $\mu$ m nitrocellulose membrane in 20 mM Tris, 150 mM glycine and 12% methanol. Membranes were blocked with 4% milk solution (prepared in PBS with 0.1% Tween 20) and incubated with primary antibody for 2 hours at room temperature or overnight at 4°C. The membranes were washed in blocking solution and incubated with horseradish peroxidase-coupled secondary antibody. Antigen was detected using West Pico reagent (Pierce Biotechnology Inc.). Immunoreactive bands were visualized following exposure of the membranes to Kodak film. Bound antisera were quantitated by Biorad Fluor-S MultiImager Max and QuantityOne 4.2.1 software.

### Immunofluorescence

*Lymnaea* neurons were plated on coverslips and maintained in *Lymnaea* brain conditioned medium with or without quercetin overnight (12–18 hrs). Neurons were washed in PBS and fixed in

2% paraformaldehyde for 1 hour at room temperature then washed 3 times with PBS for 10 minutes each. After blocking in 10% goat serum solution containing 0.3% Triton-X100 for 30 minutes cells were incubated with primary antibody in the blocking solution for 2 hours at room temperature or overnight at 4°C, washed 3 times with PBS for 10 minutes each, and incubated with goat anti-mouse conjugated to Alexafluor 546 secondary antibody in the blocking solution for 1 hour at room temperature. Cells were then washed 3 times in PBS for 10 minutes each, mounted with DABCO (Sigma) and photographed with a confocal microscope (LSM 510 Meta, Zeiss, Germany) under a 63X oil immersion objective at 543 nm excitation wavelength and images were collected using a band-pass filter (560–615).

### Electrophysiology

Neuronal activity was recorded using conventional intracellular recording techniques as described previously [30]. Glass microelectrodes (1.5 mm internal diameter; World Precision Instruments, Sarasota, FL) with tip resistances of 20–50 M $\Omega$  were filled with a saturated solution of K<sub>2</sub>SO<sub>4</sub>. Neurons were impaled using Narashige (Tokyo, Japan) micromanipulators (MM202 and MM204) (Axiovert 135; Zeiss, Thornwood, NY) on an inverted microscope. To test for synaptic connections, current was injected into the presynaptic neuron VD4 via an intracellular microelectrode which induced action potentials in the VD4 cell, and postsynaptic responses in LPeD1. The recorded electrical signals were displayed on a digital oscilloscope (PM 3394; Philips, Eindhoven, Netherlands) and relayed through a digitizer (Digidata 1322A, MDS Inc, Toronto, Canada) and recorded on a computer using Axoscope 9.0 software (MDS Inc, Toronto, Canada). Acetylcholine (ACh, 1  $\mu$ M) was pressure applied (10–20 psi, 0.5–1 s duration) directly to the somata through a glass pipette (2–4  $\mu$ m tip diameter) connected to a PV800 pneumatic picopump (World Precision Instruments).

Whole-cell recordings of voltage-gated Ca<sup>2+</sup> currents (I<sub>Ca</sub>) were performed using a Multiclamp 700B amplifier (Axon Instruments) connected to an analog-to-digital interface Digidata 1322 (Axon Instruments). Signals were acquired and stored on a personal computer equipped with pClamp 9.2 software (Axon Instruments). Borosilicate pipettes (A-M Systems, Inc, Sequim, WA) were pulled using a Sutter P-97 microelectrode puller (Sutter) and the pipette resistance was 3–7 M $\Omega$  after being filled with pipette solution containing: 35 mM CsCl; 1 mM CaCl<sub>2</sub>; 2 mM MgATP; 10 mM EGTA; 10 mM HEPES; adjusted to pH 7.4 with CsOH. The external bath solutions used to isolate Ca<sup>2+</sup> currents contains: 10 mM CaCl<sub>2</sub>; 1 mM MgCl<sub>2</sub>; 45.7 mM TEA-Cl; 10 mM HEPES; 5 mM 4-AP; adjusted to pH 7.9 with TEA-OH. I<sub>Ca</sub> in the presynaptic VD4 cells were elicited by depolarizing the cells from a holding potential of –80 mV to +70 mV in 10 mV steps. The Ca<sup>2+</sup> current data were analyzed using Clampfit 9.0 software (Axon Instruments) and traces were plotted using OriginPro 8.0 SRO (Northampton, MA, USA).

### Ca<sup>2+</sup> imaging

Fura-2 AM (Molecular Probes, Carlsbad, CA), a membrane permeable and ratiometric Ca<sup>2+</sup> sensor, was used to determine changes in the intracellular Ca<sup>2+</sup> levels. A detailed Ca<sup>2+</sup> measurement procedure has been described elsewhere [52]. In brief, neurons were loaded with Fura-2 AM (10  $\mu$ M) at room temperature (21–22°C) for 45 min. and were then exposed alternately to excitation wavelengths 340 and 380 nm using a high-speed wavelength switcher LAMBDA DG4 (Sutter Instrument, Novato, CA). The emitted fluorescence signal was collected

at 510 nm by a Regiga Exi camera. Images were acquired with Northern Eclipse software running ionwave program (Empix Imaging, Canada). The free intracellular  $\text{Ca}^{2+}$  concentration ( $[\text{Ca}^{2+}]_i$ ) was estimated based on values obtained with a fura-2  $\text{Ca}^{2+}$  imaging calibration kit (F-6774, Molecular Probes) according to [53].

### Immunoprecipitation

Immunoprecipitation was achieved by incubating detergent solubilized cells with the myc-monoclonal overnight at  $4^\circ\text{C}$ , followed by protein A/G agarose for 2 hrs at  $4^\circ\text{C}$ . Samples were washed, resuspended in 30ul of sample buffer, separated by SDS-PAGE, transferred to nitrocellulose and probed with antibodies for Western blot analysis.

### References

- Zhao X, Braun AP, Braun JE (2008) Biological Roles of Neural J Proteins. *Cell Mol Life Sci* 65: 2385–2396.
- Mastrogiacomo A, Parsons SM, Zampighi GA, Jenden DJ, Umbach JA, et al. (1994) Cysteine string proteins: a potential link between synaptic vesicles and presynaptic  $\text{Ca}^{2+}$  channels. *Science* 263: 981–982.
- Blondeau F, Ritter B, Allaire PD, Wasiak S, Girard M, et al. (2004) Tandem MS analysis of brain clathrin-coated vesicles reveals their critical involvement in synaptic vesicle recycling. *Proc Natl Acad Sci U S A* 101: 3833–3838.
- Zinsmaier KE, Eberle KK, Buchner E, Walter N, Benzer S (1994) Paralysis and early death in cysteine string protein mutants of *Drosophila*. *Science* 263: 977–980.
- Fernandez-Chacon R, Wolfel M, Nishimune H, Tabares L, Schmitz F, et al. (2004) The synaptic vesicle protein CSP alpha prevents presynaptic degeneration. *Neuron* 42: 237–251.
- Schmitz F, Tabares L, Khimich D, Strenke N, Villa-Polo P, et al. (2006) CSPalpha-deficiency causes massive and rapid photoreceptor degeneration. *Proc Natl Acad Sci U S A* 103: 2926–2931.
- Chandra S, Gallardo G, Fernandez-Chacon R, Schluter OM, Sudhof TC (2005) Alpha-synuclein cooperates with CSPalpha in preventing neurodegeneration. *Cell* 123: 383–396.
- Bronk P, Nie Z, Klose MK, Dawson-Scully K, Zhang J, et al. (2005) The multiple functions of cysteine-string protein analyzed at *Drosophila* nerve terminals. *J Neurosci* 25: 2204–2214.
- Umbach JA, Zinsmaier KE, Eberle KK, Buchner E, Benzer S, et al. (1994) Presynaptic dysfunction in *Drosophila* csp mutants. *Neuron* 13: 899–907.
- Nie Z, Ranjan R, Wenniger JJ, Hong SN, Bronk P, et al. (1999) Overexpression of cysteine-string proteins in *Drosophila* reveals interactions with syntaxin. *J Neurosci* 19: 10270–10279.
- Dawson-Scully K, Bronk P, Atwood HL, Zinsmaier KE (2000) Cysteine-string protein increases the calcium sensitivity of neurotransmitter exocytosis in *Drosophila*. *J Neurosci* 20: 6039–6047.
- Arnold C, Reisch N, Leibold C, Becker S, Profert K, et al. (2004) Structure-function analysis of the cysteine string protein in *Drosophila*: cysteine string, linker and C terminus. *J Exp Biol* 207: 1323–1334.
- Dawson-Scully K, Lin Y, Imad M, Zhang J, Marin L, et al. (2007) Morphological and functional effects of altered cysteine string protein at the *Drosophila* larval neuromuscular junction. *Synapse* 61: 1–16.
- Braun JE, Wilbanks SM, Scheller RH (1996) The cysteine string secretory vesicle protein activates Hsc70 ATPase. *J Biol Chem* 271: 25989–25993.
- Stahl B, Tobaben S, Sudhof TC (1999) Two distinct domains in hsc70 are essential for the interaction with the synaptic vesicle cysteine string protein. *Eur J Cell Biol* 78: 375–381.
- Chamberlain LH, Burgoyne RD (1997) Activation of the ATPase activity of heat-shock proteins Hsc70/Hsp70 by cysteine-string protein. *Biochem J* 322(Pt 3): 853–858.
- Tobaben S, Thakur P, Fernandez-Chacon R, Sudhof TC, Rettig J, et al. (2001) A trimeric protein complex functions as a synaptic chaperone machine. *Neuron* 31: 987–999.
- Natochin M, Campbell TN, Barren B, Miller LC, Hameed S, et al. (2005) Characterization of the G alpha(s) regulator cysteine string protein. *J Biol Chem* 280: 30236–30241.
- Gibbs SJ, Barren B, Beck KE, Proft J, Zhao X, et al. (2009) Hsp40 couples with the CSPalpha chaperone complex upon induction of the heat shock response. *PLoS ONE* 4: e4595.
- Johnson JN, Ahrendt E, Braun JEA (2009) CSP: The Neuroprotective J Protein. *Biochemistry and Cell Biology* 88: 157–165.
- Gibbs SJ, Braun JE (2008) Emerging roles of J proteins in neurodegenerative disorders. *Neurobiol Dis* 32: 196–199.
- Braun JE, Scheller RH (1995) Cysteine string protein, a DnaJ family member, is present on diverse secretory vesicles. *Neuropharmacology* 34: 1361–1369.
- Magga JM, Jarvis SE, Arnot MI, Zamponi GW, Braun JE (2000) Cysteine string protein regulates G-protein modulation of N-type calcium channels. *Neuron* 28: 195–204.
- Bai L, Swayne LA, Braun JE (2007) The CSPalpha/G protein complex in PC12 cells. *Biochem Biophys Res Commun* 352: 123–129.
- Chamberlain LH, Burgoyne RD (1998) The cysteine-string domain of the secretory vesicle cysteine-string protein is required for membrane targeting. *Biochem J* 335(Pt 2): 205–209.
- Swayne LA, Blattler C, Kay JG, Braun JEA (2003) Oligomerization characteristics of cysteine string protein. *Biochemical and Biophysical Research Communications* 300: 921–926.
- Gundersen CB, Mastrogiacomo A, Faull K, Umbach JA (1994) Extensive lipidation of a Torpedo cysteine string protein. *Journal of Biological Chemistry* 269: 19197–19199.
- Feng ZP, Klumperman J, Lukowiak K, Syed NI (1997) In vitro synaptogenesis between the somata of identified *Lymnaea* neurons requires protein synthesis but not extrinsic growth factors or substrate adhesion molecules. *J Neurosci* 17: 7839–7849.
- Hamakawa T, Woodin MA, Bjorgum MC, Painter SD, Takasaki M, et al. (1999) Excitatory synaptogenesis between identified *Lymnaea* neurons requires extrinsic trophic factors and is mediated by receptor tyrosine kinases. *J Neurosci* 19: 9306–9312.
- Woodin MA, Hamakawa T, Takasaki M, Lukowiak K, Syed NI (1999) Trophic factor-induced plasticity of synaptic connections between identified *Lymnaea* neurons. *Learn Mem* 6: 307–316.
- Miller LC, Swayne LA, Kay JG, Feng ZP, Jarvis SE, et al. (2003) Molecular Determinants of Cysteine String Protein Modulation of N-type Calcium Channels. *Journal of Cell Science* 116: 2967–2974.
- Leveque C, Pupier S, Marqueze B, Geslin L, Kataoka M, et al. (1998) Interaction of cysteine string proteins with the alpha1A subunit of the P/Q-type calcium channel. *Journal of Biological Chemistry* 273: 13488–13492.
- Gundersen CB, Umbach JA (1992) Suppression cloning of the cDNA for a candidate subunit of a presynaptic calcium channel. *Neuron* 9: 527–537.
- Chen S, Zheng X, Schulze KL, Morris T, Bellen H, et al. (2002) Enhancement of presynaptic calcium current by cysteine string protein. *J Physiol* 538: 383–389.
- Umbach JA, Gundersen CB (1997) Evidence that cysteine string proteins regulate an early step in the  $\text{Ca}^{2+}$ -dependent secretion of neurotransmitter at *Drosophila* neuromuscular junctions. *J Neurosci* 17: 7203–7209.
- Ranjan R, Bronk P, Zinsmaier KE (1998) Cysteine string protein is required for calcium secretion coupling of evoked neurotransmission in *Drosophila* but not for vesicle recycling. *J Neurosci* 18: 956–964.
- Umbach JA, Saitoe M, Kidokoro Y, Gundersen CB (1998) Attenuated influx of calcium ions at nerve endings of csp and shibire mutant *Drosophila*. *J Neurosci* 18: 3233–3240.
- Swayne LA, Beck KE, Braun JE (2006) The cysteine string protein multimeric complex. *Biochem Biophys Res Commun* 348: 83–91.
- Saponara S, Sgaragli G, Fusi F (2002) Quercetin as a novel activator of L-type  $\text{Ca}^{2+}$  channels in rat tail artery smooth muscle cells. *Br J Pharmacol* 135: 1819–1827.
- Saponara S, Sgaragli G, Fusi F (2008) Quercetin antagonism of Bay K 8644 effects on rat tail artery L-type  $\text{Ca}^{2+}$  channels. *Eur J Pharmacol* 598: 75–80.
- Wu SN, Chiang HT, Shen AY, Lo YK (2003) Differential effects of quercetin, a natural polyphenolic flavonoid, on L-type calcium current in pituitary tumor (GH3) cells and neuronal NG108-15 cells. *J Cell Physiol* 195: 298–308.
- Cogolludo A, Frazziano G, Briones AM, Cobeno L, Moreno L, et al. (2007) The dietary flavonoid quercetin activates BKCa currents in coronary arteries via production of  $\text{H}_2\text{O}_2$ . Role in vasodilatation. *Cardiovasc Res* 73: 424–431.
- Pattnaik BR, Hughes BA (2009) Regulation of Kir Channels in Bovine Retinal Pigment Epithelial Cells by Phosphatidylinositol 4,5-bisphosphate. *Am J Physiol Cell Physiol*.
- Barzilai A, Rahamimoff H (1983) Inhibition of  $\text{Ca}^{2+}$ -transport ATPase from synaptosomal vesicles by flavonoids. *Biochim Biophys Acta* 730: 245–254.

### Acknowledgments

We thank Drs. Andy Braun and Gerald Zamponi for their critical review of this manuscript. The technical assistance of Wali Zaidi and Svetlana Farkas is gratefully acknowledged.

### Author Contributions

Conceived and designed the experiments: NS JEAB. Performed the experiments: FX JP SJG. Analyzed the data: FX NS JEAB. Contributed reagents/materials/analysis tools: RW JNJ JEAB. Wrote the paper: FX NS JEAB. Principal Investigator: JEAB.

45. Shoshan V, MacLennan DH (1981) Quercetin interaction with the (Ca<sup>2+</sup> + Mg<sup>2+</sup>)-ATPase of sarcoplasmic reticulum. *J Biol Chem* 256: 887–892.
46. Feng ZP, Hasan SU, Lukowiak K, Syed NI (2000) Target cell contact suppresses neurite outgrowth from soma-soma paired *Lymnaea* neurons. *J Neurobiol* 42: 357–369.
47. Young JC, Agashe VR, Siegers K, Hartl FU (2004) Pathways of chaperone-mediated protein folding in the cytosol. *Nat Rev Mol Cell Biol* 5: 781–791.
48. Walsh P, Bursac D, Law YC, Cyr D, Lithgow T (2004) The J-protein family: modulating protein assembly, disassembly and translocation. *EMBO Rep* 5: 567–571.
49. Rosales-Hernandez A, Beck KE, Zhao X, Braun AP, Braun JE (2008) RDJ2 (DNAJA2) chaperones neural G protein signaling pathways. *Cell Stress Chaperones* 14: 71–82.
50. Do T, Sun Q, Beuve A, Kuzhikandathil EV (2007) Extracellular cAMP inhibits D1 dopamine receptor expression in CAD catecholaminergic cells via A2a adenosine receptors. *J Neurochem* 101: 619–631.
51. Syed NI, Zaidi H, Lovell P (1999) In vitro reconstruction of neuronal circuits: a simple model system approach. In: Windhurst U, Johansson H, eds. *Modern Techniques in Neuroscience Research*. pp 361–377.
52. Xu F, Hennessy DA, Lee TK, Syed NI (2009) Trophic factor-induced intracellular calcium oscillations are required for the expression of postsynaptic acetylcholine receptors during synapse formation between *Lymnaea* neurons. *J Neurosci* 29: 2167–2176.
53. Kao JP (1994) Practical aspects of measuring [Ca<sup>2+</sup>] with fluorescent indicators. *Methods Cell Biol* 40: 155–181.
